# Supplementary material
Source: ML conference proceedings conference paper supplement (https://www.ecva.net/papers/eccv_2022/papers_ECCV/html/136920715_ECCV_2022_paper.php)
Supplement: Supplementary file 2 [file 136920715-supp.zip]

Archive with 13 entries (11 files):
- supplementary/
- supplementary/PlanarTransforms/
- supplementary/PlanarTransforms/CBezierN.pde
- supplementary/PlanarTransforms/ChebyshevCurve.pde
- supplementary/PlanarTransforms/HermiteCurve.pde
- supplementary/PlanarTransforms/ParametricCurve.pde
- supplementary/PlanarTransforms/PlanarMapping.pde
- supplementary/PlanarTransforms/PlanarTransforms.pde
- supplementary/PlanarTransforms/RadialHomographyMapping.pde
- supplementary/PlanarTransforms/SinusoidMapping.pde
- supplementary/PlanarTransforms/TaylorCurve.pde
- supplementary/readme.txt
- supplementary/5702-supp.pdf
