# Supplementary material
Source: ML conference proceedings conference paper supplement (https://www.ecva.net/papers/eccv_2022/papers_ECCV/html/136920715_ECCV_2022_paper.php)
Supplement: Supplementary file 2 [file 136920715-supp.zip › supplementary/PlanarTransforms/CBezierN.pde]

class BezierN
{
  // degree n Bezier curve
  BezierN(int n)
  {
    degree = n;
    initControlData();
    
    selected = -1;
    
    drawMode = 1;
    incr = 1.0 / 512.0;
    
    mainColor = color( 0, 0, 0 );
  }
  
  void initControlData()
  {
    // compute the Bernstein polynomial's binomial coefficients here
    temp = new float[degree+1];
    B = new float[degree+1];
    
    // control point array
    cp = new PVector[degree+1];
    for ( int i=0; i<cp.length; ++i ) cp[i] = new PVector(0,0);
  }
  
  // the non-trivial part of the Bernstein equidistance reconstruction matrices from degree 2 to 4
  final float B2[][] = { {-0.5, 2.0, -0.5} };
  final float B3[][] = { {-1.1111111111111114, 2.6666666666666674, -0.8888888888888886, 0.3333333333333331 },
                         {0.3333333333333336, -0.8888888888888896, 2.666666666666666, -1.1111111111111105 } 
                       };
  final float B4[][] = {  {-1.7500000000000002, 3.4142135623730954, -1.0000000000000002, 0.5857864376269049, -0.2499999999999999 },
                          {1.1666666666666667, -2.6666666666666674, 4.000000000000002, -2.6666666666666665, 1.1666666666666663 },
                          {-0.25000000000000006, 0.5857864376269052, -1.0000000000000007, 3.414213562373095, -1.7499999999999996 }
                       };
  final float B5[][] = {
                          {-2.4, 4.188854381999831, -1.1577708763999655, 0.6111456180001676, -0.4422291236000332, 0.19999999999999993 },
                          {2.5199999999999996, -5.294427190999914, 5.849968943799847, -3.5055728090000824, 2.63003105620015, -1.2000000000000002 },
                          {-1.2000000000000002, 2.6300310562001514, -3.5055728090000833, 5.849968943799848, -5.294427190999916, 2.5200000000000014 },
                          {0.20000000000000004, -0.44222912360003364, 0.6111456180001681, -1.1577708763999661, 4.188854381999832, -2.400000000000001 }    
                       };
  final float B6[][] = {
                          {-3.055555555555557, 4.97606774342517, -1.333333333333334, 0.6666666666666665, -0.44444444444444425, 0.3572655899081633, -0.1666666666666667 },
                          {4.400000000000004, -8.768090324566895, 8.177777777777782, -4.6222222222222245, 3.1999999999999984, -2.6096874532108836, 1.2222222222222237 },
                          {-3.300000000000004, 6.933333333333335, -8.000000000000005, 9.73333333333334, -7.999999999999996, 6.93333333333333, -3.300000000000004 },
                          {1.2222222222222239, -2.609687453210886, 3.200000000000002, -4.622222222222225, 8.177777777777772, -8.76809032456689, 4.400000000000005 },
                          {-0.1666666666666667, 0.3572655899081633, -0.44444444444444425, 0.6666666666666663, -1.3333333333333306, 4.97606774342517, -3.0555555555555585 }   
                       };
  final float B7[][] = {
                          {-3.714285714285715, 5.770191245168349, -1.517697460120779, 0.7349761509803341, -0.4674182302787382, 0.35197546099417704, -0.3005985953147673, 0.1428571428571427 },
                          {6.809523809523812, -13.087429699728109, 10.971970630553772, -5.984563759228154, 3.9518709701789234, -3.0232446362818446, 2.5999679230768225, -1.2380952380952344 },
                          {-7.004081632653065, 14.294285653884259, -15.019852624912941, 15.374181735761228, -11.860213244220283, 9.645818324640244, -8.515852498213698, 4.085714285714272 },
                          {4.085714285714288, -8.51585249821373, 9.645818324640254, -11.860213244220288, 15.37418173576122, -15.019852624912923, 14.294285653884211, -7.0040816326530395 },
                          {-1.2380952380952388, 2.5999679230768313, -3.023244636281846, 3.951870970178926, -5.984563759228148, 10.971970630553763, -13.087429699728077, 6.809523809523793 },
                          {0.142857142857143, -0.30059859531476807, 0.3519754609941763, -0.4674182302787393, 0.7349761509803325, -1.5176974601207789, 5.770191245168344, -3.71428571428571 } 
                       };
  final float B8[][] = {
                          {-4.3749999999999964, 6.568535592272037, -1.707106781186545, 0.8099572022108813, -0.4999999999999971, 0.36161567304291764, -0.2928932188134498, 0.259891532474144, -0.12499999999999754 },
                          {9.749999999999982, -18.252754861147096, 14.228282820920933, -7.581239029125339, 4.857142857142837, -3.5700287570239952, 2.9145743219361737, -2.5959773527034677, 1.2499999999999882 },
                          {-12.767857142857098, 25.511525604260203, -25.11290970026734, 23.097992094142484, -17.07142857142852, 13.306068923678273, -11.17280458544684, 10.084413377918791, -4.874999999999972 },
                          {10.214285714285667, -20.917649971602533, 22.399999999999938, -24.79663574268303, 27.199999999999953, -24.796635742683048, 22.399999999999945, -20.91764997160256, 10.214285714285682 },
                          {-4.874999999999977, 10.084413377918793, -11.172804585446858, 13.306068923678293, -17.071428571428555, 23.097992094142533, -25.112909700267366, 25.51152560426025, -12.767857142857121 },
                          {1.2499999999999938, -2.5959773527034695, 2.9145743219361826, -3.5700287570240086, 4.857142857142853, -7.5812390291253635, 14.22828282092094, -18.252754861147114, 9.74999999999999 },
                          {-0.12499999999999935, 0.2598915324741438, -0.29289321881345154, 0.3616156730429214, -0.49999999999999956, 0.8099572022108867, -1.7071067811865464, 6.568535592272043, -4.374999999999998 }
                       };
  
  // construct a Bezier curve from a set of points, i.e. use interpolation to 
  // construct a degree n Bezier curve that passes through n+1 points
  BezierN(PVector[] pts)
  {
    degree = pts.length - 1;
    initControlData();
    
    switch ( degree )
    {
      case 1:
        cp[0] = pts[0];
        cp[1] = pts[1];
        break;
        
      case 2:
        cp[0] = pts[0];
        cp[1].x = 0;
        cp[1].y = 0;
        for ( int i=0; i<pts.length; ++i )
        {
          cp[1].x += B2[0][i] * pts[i].x;
          cp[1].y += B2[0][i] * pts[i].y;
        }
        cp[2] = pts[2];
        break;
        
      case 3:
        cp[0] = pts[0];
        cp[1].x = 0;
        cp[1].y = 0;
        cp[2].x = 0;
        cp[2].y = 0;
        for ( int j=1; j<=2; ++j )
        {
          for ( int i=0; i<pts.length; ++i )
          {
            cp[j].x += B3[j-1][i] * pts[i].x;
            cp[j].y += B3[j-1][i] * pts[i].y;
          }
        }
        cp[3] = pts[3];
        break;
        
      case 4:
        cp[0] = pts[0];
        cp[1].x = 0;
        cp[1].y = 0;
        cp[2].x = 0;
        cp[2].y = 0;
        cp[3].x = 0;
        cp[3].y = 0;
        for ( int j=1; j<=3; ++j )
        {
          for ( int i=0; i<pts.length; ++i )
          {
            cp[j].x += B4[j-1][i] * pts[i].x;
            cp[j].y += B4[j-1][i] * pts[i].y;
          }
        }
        cp[4] = pts[4];
        break;
        
      case 5: {
        cp[0] = pts[0];
        int N = 4;
        for ( int i=1; i<=N; ++i )
        {
          cp[i].x = 0.0;
          cp[i].y = 0.0;
        }
        for ( int j=1; j<=N; ++j )
        {
          for ( int i=0; i<pts.length; ++i )
          {
            cp[j].x += B5[j-1][i] * pts[i].x;
            cp[j].y += B5[j-1][i] * pts[i].y;
          }
        }
        cp[N+1] = pts[N+1];
        break;
      }
        
      case 6: {
        cp[0] = pts[0];
        int N = 5;
        for ( int i=1; i<=N; ++i )
        {
          cp[i].x = 0.0;
          cp[i].y = 0.0;
        }
        for ( int j=1; j<=N; ++j )
        {
          for ( int i=0; i<pts.length; ++i )
          {
            cp[j].x += B6[j-1][i] * pts[i].x;
            cp[j].y += B6[j-1][i] * pts[i].y;
          }
        }
        cp[N+1] = pts[N+1];
        break;
      }
        
      case 7: {
        cp[0] = pts[0];
        int N = 6;
        for ( int i=1; i<=N; ++i )
        {
          cp[i].x = 0.0;
          cp[i].y = 0.0;
        }
        for ( int j=1; j<=N; ++j )
        {
          for ( int i=0; i<pts.length; ++i )
          {
            cp[j].x += B7[j-1][i] * pts[i].x;
            cp[j].y += B7[j-1][i] * pts[i].y;
          }
        }
        cp[N+1] = pts[N+1];
        break;   
      }
        
      case 8: {
        cp[0] = pts[0];
        int N = 7;
        for ( int i=1; i<=N; ++i )
        {
          cp[i].x = 0.0;
          cp[i].y = 0.0;
        }
        for ( int j=1; j<=N; ++j )
        {
          for ( int i=0; i<pts.length; ++i )
          {
            cp[j].x += B8[j-1][i] * pts[i].x;
            cp[j].y += B8[j-1][i] * pts[i].y;
          }
        }
        cp[N+1] = pts[N+1];
        break;
      }
    }
    selected = -1;
    
    drawMode = 1;
    incr = 1.0 / 512.0;
    
    mainColor = color( 0, 0, 0 );  
  }
  
  void randomize()
  {
    degree = (int)random(2, 10);
    // compute the Bernstein polynomial's binomial coefficients here
    temp = new float[degree+1];
    B = new float[degree+1];
    
    // control point array
    cp = new PVector[degree+1];
    
    for (int i=0; i<=degree; ++i)
      cp[i] = new PVector( random(0, width), random(0, height) );
  }
  
  color mainColor;
  
  void draw()
  {
    ArrayList ptList = new ArrayList();
    
    if ( (drawMode & 4) == 4 )
    {
      strokeWeight(2);
      stroke(mainColor + 100);
      noFill();
      
      beginShape();

      for (int i=0; i<=degree; ++i)
      {
        PVector p = (PVector)cp[i];
        vertex(p.x, p.y);
      }

      endShape();
    } // end of controlpolygon draw

    if ( (drawMode & 2) == 2 )
    {
      strokeWeight(8);
      stroke(mainColor+80);
      
      for (int i=0; i<=degree; ++i)
      {
        PVector p = (PVector)cp[i];

        if ( selected == i )
        {
          strokeWeight(15);
          stroke(160);
          
          point(p.x, p.y);
          
          strokeWeight(8);
          stroke(mainColor+80);
        }
      
        point(p.x, p.y);
      }
    } // end of controlpoint drawing
    
    if ( true || (drawMode & 1) == 1 )
    {
      for (float t=0; t<=1; t += incr)
      {
        PVector pt = getU(t);
        
        ptList.add(pt);
      }
      
      strokeWeight(2);
      stroke(mainColor);
      noFill();
      
      beginShape();
      for (int i=0; i<ptList.size(); ++i)
      {
        PVector p = (PVector)ptList.get(i);
        
        vertex(p.x, p.y);
      }
      endShape();
    } // end of curve drawing   
   
    if ( (drawMode & 8) == 8 && off != 0 )
    {
      ptList.clear();

      for (float t=0; t<=1; t += incr)
      {
        PVector pt = getOffsetPoint(off, t);
        
        ptList.add(pt);
      }
      
      strokeWeight(1.5);
      stroke(mainColor + color(64, 255, 64));
      noFill();
      
      beginShape();
      for (int i=0; i<ptList.size(); ++i)
      {
        PVector p = (PVector)ptList.get(i);
        
        vertex(p.x, p.y);
      }
      endShape();
      
      textSize(12);
      textAlign(LEFT, TOP);
      fill(0);

      text( "Measured distance from offset: " + getDistanceFromOffset() + ", offset = " + abs(off), 5, 25);
    } 
  }
  
  void setCP(int i, PVector p)
  {
    cp[i] = p;
  }
  
  void toggleCP()
  {
    drawMode ^= 2;
  }
  
  void toggleCurve()
  {
    drawMode ^= 1;
  }
  
  void togglePolygon()
  {
    drawMode ^= 4;
  }
  
  void toggleOffset()
  {
    drawMode ^= 8;
  }
  
  void setOffset(float t)
  {
    off = t;
  }

  PVector getU(float t)
  {
      ComputeAllBezier(t);
      
      PVector pt = new PVector(0, 0, 0);
      
      for (int i=0; i<=degree; ++i)
      {
        pt.x += B[i]*cp[i].x;
        pt.y += B[i]*cp[i].y;
      }
      
      return pt;
  }
  
  PVector getDu(float t)
  {
    BezierN db = getDerivateCurve();
    PVector d = db.getU(t);
    return new PVector(degree*d.x, degree*d.y);
  }
  
  PVector rotTangent(PVector t)
  {
    return new PVector(t.y, -t.x);
  }
  
  void ComputeAllBezier(float u)
  {
    B[0] = 1.0;
    float u1 = 1.0-u;
    
    for (int j=1; j<=degree; ++j)
    {
      float s = 0;
      
      for (int k=0; k<j; ++k)
      {
        float tmp = B[k];
        B[k] = s + u1*tmp;
        s = u*tmp;
      }
      
      B[j] = s;
    }
  }
  
  float Bernstein(int i, int n, float u)
  {
  
    for (int j=0; j<=n; ++j)
    {
      temp[j] = 0;
    }
  
    temp[n-i] = 1.0;
    float u1 = 1.0-u;
  
    for (int k=1; k<=n; ++k)
    {
      for (int j=n; j>=k; --j)
      {
        temp[j] = u1*temp[j] + u*temp[j-1];
      }
    }
  
    return temp[n];
  }  
  
  void mouseClicked()
  {
    selected = -1;
    for (int i=0; i<=degree; ++i)
      if ( abs(mouseX-cp[i].x) <= 5 && abs(mouseY-cp[i].y) <= 5 )
        selected = i;
  }
  
  boolean mouseMoved()
  {
    boolean changed = selected > -1;
    if (selected > -1)
    {
      float prevX = cp[selected].x;
      float prevY = cp[selected].y;
      
      float newX = constrain(mouseX, 0, width);
      float newY = constrain(mouseY, 0, height);
      
      if ( newX != prevX || newY != prevY )
      {
        cp[selected].x = newX;
        cp[selected].y = newY;
        changed = true;  
      }
    }
    return changed;
  }

  int GetClosestCP(PVector p)
  {
    // look for the closest control polygon
    // if it's index is i let the result be i/n
    
    float m = 3.40282346638528860e+38;
    int idx = -1;
    
    for (int i=0; i<=degree; ++i)
    {
      float d = dst(p, cp[i]);

      if ( d < m )
      {
        m = d;
        idx = i;
      }
    }
    
    return idx;
  }
  
  float dst(PVector a, PVector b)
  {
    return sqrt( (a.x-b.x)*(a.x-b.x) + (a.y-b.y)*(a.y-b.y) );
  }
  
  BezierN getDerivateCurve()
  {
    BezierN db = new BezierN(degree-1);
    
    for (int i=0; i<=degree-1; ++i)
    {
      db.cp[i] = new PVector();
      db.cp[i].x = 1*(cp[i+1].x - cp[i].x);
      db.cp[i].y = 1*(cp[i+1].y - cp[i].y);
    }
    
    return db;
  }
  
  PVector getT( float u )
  {
    BezierN db = getDerivateCurve(); // first derivate
    
    PVector dx = db.getU(u);
    
    PVector t = new PVector( dx.x, dx.y );
    t.normalize();
    
    return t; 
  }
  
  PVector getN( float u )
  {
    PVector t = getT( u );
    return new PVector( -t.y, t.x );
  }
  
  float getK( float u )
  {
    if ( degree < 2 ) return 0.0;
    
    BezierN db = getDerivateCurve(); // first derivate
    BezierN ddb = db.getDerivateCurve(); // second derivate
   
    PVector dx = db.getU(u);
    PVector ddx = ddb.getU(u);
    
    PVector t = new PVector( dx.x, dx.y );
    t.normalize();
    PVector n = new PVector( -t.y, t.x );
    
    float x1 = dx.mag();
    float y2 = ddx.dot( n );
    
    return y2 / (x1 * x1);
  }
  
  PVector getOffsetPoint(float d, float t)
  {
    PVector o = getU(t);
    
    PVector v = rotTangent( getDu(t) );
    v.normalize();
    
    o.x += d*v.x;
    o.y += d*v.y;
    
    return o;
  }

  float getClosest(PVector p, boolean b)
  {
    // returns the parameter value of the curve point that is
    // closest to point p
    
    // starting point
    //float u = (float)GetClosestCP(p)/(float)degree;
    //float u = 0.5;
    
    float u = 0;
    float m = 10000;
    float d0 = 0, d1 = 0;
    
    for (int i=0; i<15; ++i)
    {
      float idx = (float)i/(float)14;
      PVector pt = getU( idx );
      float d = dst(pt, p);
      
      if ( i== 0)
        d0 = d;
      if ( i== 14)
        d1 = d;
      
      if ( d < m )
      {
        m = dst(pt, p);
        u = idx;
      }
    }
    
    float un = 0;
    
    // we need first and second derivates => ASSERT: degree >= 2
    BezierN db = getDerivateCurve(); // first derivate
    BezierN ddb = db.getDerivateCurve(); // second derivate
    
    // do iteration
    int iter = 0;
    boolean terminate = false;
    
    do
    {
      PVector x = getU(u);
      PVector dx = db.getU(u);
      PVector ddx = ddb.getU(u);
      
      float nom = PVector.dot( PVector.sub(x, p), dx);
      float denom = (degree-1)*PVector.dot( PVector.sub(x,p), ddx) + degree*PVector.dot(dx, dx);
      
      float a = PVector.dot( PVector.sub(p, x), PVector.sub(p,x) );
      
      if ( abs(nom*nom/( a * degree*degree*PVector.dot(dx, dx))) < 0.0000001 )
        terminate = true;
      else
      {
        un = u - ( nom ) / ( denom );
        
        if ( un > 1 )        
          un = 1;
        if ( un < 0 )
          un = 0;

        if ( abs(un - u) < 0.0000001 ) // two small difference termination
          terminate = true;
          
        u = un;
        
        ++iter;
      }
      
    } while ( terminate == false && iter < 40 );
    
    if ( b == true )
    {
      textSize(12);
      textAlign(LEFT, TOP);
      fill(0);
  
      if ( terminate == true )
        text("Iteration finished after " + iter + " iterations.", 5, 5);
      else
        text("Iteration number exceeded upper limit 40.", 5, 5);
        
      stroke(155, 50, 100);
      strokeWeight(1);

      PVector x = getU(u);
      PVector dx = db.getU(u);
      
      line(x.x, x.y, x.x+5*degree*dx.y, x.y-5*degree*dx.x);
      line(x.x, x.y, x.x-5*degree*dx.y, x.y+5*degree*dx.x);
    }

    return u;
  }
  
  float getDistanceFromOffset()
  {
    // sample offset n times and get the minimum of the distance measurments
    float m = 99999;
    for (float t=0; t<=1.0; t+=0.01)
    {
      PVector o = getOffsetPoint( off, t );
      PVector c = getU(getClosest( o, false ));
      
      if ( dst(o, c) < m )
      {
        m = dst(o, c);
      }
    }
    
    return m;
  }
  
  void updateAABB()
  {
    aMin.x = cp[0].x;
    aMin.y = cp[0].y;
    bMax.x = cp[0].x;
    bMax.y = cp[0].y;
    
    for ( int i=0; i<=degree; ++i )
    {
      aMin.x = min( aMin.x, cp[i].x );
      aMin.y = min( aMin.y, cp[i].y );
      
      bMax.x = max( bMax.x, cp[i].x );
      bMax.y = max( bMax.y, cp[i].y );
    }
  }
  
  // endpoints of the curve's AAB
  PVector aMin = new PVector();
  PVector bMax = new PVector();
  
  float temp[];
  float B[];
  PVector cp[];  
 
  int degree; 
  int drawMode;
  float incr;
  
  float off;
  
  int selected;
}
