# Supplementary material
Source: ML conference proceedings conference paper supplement (https://www.ecva.net/papers/eccv_2022/papers_ECCV/html/136920715_ECCV_2022_paper.php)
Supplement: Supplementary file 2 [file 136920715-supp.zip › supplementary/PlanarTransforms/PlanarMapping.pde]

interface PlanarMapping
{
  PVector f( PVector p );
  PVector df( int i, int j, PVector p );
  PVector boundDf( int n );
}
