# Supplementary material
Source: ML conference proceedings conference paper supplement (https://www.ecva.net/papers/eccv_2022/papers_ECCV/html/136920715_ECCV_2022_paper.php)
Supplement: Supplementary file 2 [file 136920715-supp.zip › supplementary/readme.txt]

The supplementary material of paper Space Partitioning RANSAC (#5702) contains two things. 

5702-supp.pdf:
Additional description about polynomial approximations.

PlanarTransforms:
We also submitted a Processing sketch as part of the submission.
The sketch demonstrates the proposed algorithm when having a radial distortion homography. 
This code is only for demonstration purposes and it is different from the actual optimized C++ code running in the experiments.

It can be run by loading PlanarTransforms.pde into Processing. Ctrl+R starts the application. The UI displays the help on how to control the application. 
Processing is a creative coding environment, started at MIT. Its latest version can be download from \url{https://processing.org/download}.
